# Supplementary material
Source: HighWire-hosted journal article supplement (https://www.cmajopen.ca/highwire/filestream/88926/field_highwire_adjunct_files/6/open-2022-0118-original-submission.pdf)
Supplement: open-2022-0118-original-submission.pdf [file open-2022-0118-original-submission.pdf]

## Health care utilization differences between First Nations and the general population with inflammatory bowel disease: a retrospective cohort study from Saskatchewan, Canada

**Authors:** Jose Diego Marques Santos BN, MSc<sup>1</sup>, Sharyle Fowler MD<sup>2</sup>, Derek Jennings MEd, PhD<sup>3,4</sup>, Colten Brass<sup>5</sup>, Linda Porter<sup>6</sup>, Robert Porter<sup>7</sup>, Rhonda Sanderson<sup>8</sup>, Juan Nicolás Peña-Sánchez MD, PhD<sup>1\*</sup>.

<sup>1</sup>Department of Community Health & Epidemiology, University Saskatchewan; <sup>2</sup>Department of Medicine, University Saskatchewan; <sup>3</sup>Sac and Fox, Quapaw Nation, United States of America; <sup>4</sup>School of Public Health, University of Washington, United States of America; <sup>5</sup>Muskoday First Nation, Saskatchewan, Canada; <sup>6</sup>One Arrow First Nation, Saskatchewan, Canada; <sup>7</sup>York Factory First Nation, Manitoba, Canada; <sup>8</sup>James Smith Cree Nation, Saskatchewan, Canada.

**\*Corresponding author's email address:** [juan.nicolas.ps@usask.ca](mailto:juan.nicolas.ps@usask.ca)

**Competing interests:** The authors declare no conflicts of interest.

**Contributors:** All the authors contributed to the study conception, data interpretation, revised the manuscript critically for important intellectual content, approved the final version for publication, and agreed to be accountable for all aspects of the work. Jose Diego Marques Santos and Juan-Nicolás Peña-Sánchez designed the study and contributed drafting the manuscript. Jose Diego Marques Santos completed the data analysis. Juan-Nicolás Peña-Sánchez contributed to the research methodology and led the data extraction.

**Funding:** This work was supported by the Saskatchewan Health Research Foundation (SHRF) and Saskatchewan Centre for Patient-Oriented Research (SCPOR) Sprout Grant award. This research project also received funding from the College of Medicine Graduate Award (CoMGRAD), University of Saskatchewan. The funding agencies had no role in the study or the preparation of the manuscript for publication.

**Data sharing:** The data for this study are held securely by Saskatchewan Ministry of Health and eHealth. Databases were accessed at a secure location through the Saskatchewan Health Quality Council. Permissions and affiliations are required for data access. The data are not immediately available for sharing, although the analysis could be replicated.

**Disclaimer:** This study is based on de-identified data provided by the Saskatchewan Ministry of Health and eHealth Saskatchewan. The interpretation and conclusions contained herein do not necessarily represent those of the Government of Saskatchewan, the Saskatchewan Ministry of Health, or eHealth Saskatchewan.

**Acknowledgments:** We express our gratitude to the College of Medicine of the University of Saskatchewan (CoMGRAD and CoMRAD awards), Saskatchewan Health Research Foundation (Sprout grant), and the Saskatchewan Centre for Patient-Oriented Research (Sprout grant) for supporting this study. The authors also thank the staff of Saskatchewan Health Quality Council for supporting the development of this project. In addition, special thanks to Heather McWhinney, Dr. Sarah Oosman, Dr. Xinya Lu, and the members of the IBD among Indigenous Peoples Research Team.

## Health care utilization differences between First Nations and the general population with inflammatory bowel disease: a retrospective cohort study from Saskatchewan, Canada

### Abstract

**Background:** Indigenous peoples often face barriers to access specialized care, and no studies have evaluated inflammatory bowel disease (IBD) health care utilization among Indigenous peoples. This study aimed to compare health care utilization between First Nations (FNs) and the general population (GP) diagnosed with IBD in Saskatchewan.

**Methods:** A patient-oriented population-based retrospective cohort study was conducted by linking administrative health databases of Saskatchewan from 1998/1999 to 2017/2018 fiscal years. Following a patient-oriented approach, the study was designed and completed in partnership with Indigenous patients and family advocates. A validated algorithm was applied to identify incident IBD cases. The self-declared FN status variable was used to divide IBD cases. A 1:5 age and sex matching was applied. Cox-proportional models were used to assess associations and hazard ratios (HRs) and 95% confidence intervals (95%CI) were reported.

**Results:** A matched cohort with 696 IBD incident cases was created (FNs=116, GP=580). Adjusting by rural/urban residence and diagnosis type, differences between the groups were observed for IBD-specific hospitalizations (HR=1.33, 95%CI:1.01-1.75), IBD-related hospitalizations (HR=1.55, 95%CI:1.20-2.01), medication claims for IBD (HR=0.52, 95%CI:0.41-0.65), and 5-aminosalicylic acid claims (HR=0.56, 95%CI:0.45-0.71). There were no statistically significant differences in the hazard rate of outpatient gastroenterology visits (HR=1.13, 95%CI:0.90-1.41), colonoscopies (HR=1.14, 95%CI:0.92-1.41), and surgeries for IBD (HR=1.14, 95%CI:0.80-1.64).

**Interpretation:** We identified that FNs diagnosed with IBD had a higher rate of having hospitalizations due to IBD compared to individuals from the GP diagnosed with IBD. Also, an inverse association between FN status and having prescription medication claims for IBD was found.

**Key words:** Indigenous people, inflammatory bowel disease, ulcerative colitis, Crohn's disease, health services utilization, access to care

### Plain language summary

Indigenous patients living with IBD have manifested concerns about access to IBD care. There are limited studies about IBD among Indigenous peoples. This study looked at health care utilization differences between First Nations (FNs) and the general population with the diagnosis of IBD. Indigenous patient and family advocates were engaged in the conception, design, and completion of this study. By looking back in time and using administrative health databases, we identified IBD cases in Saskatchewan from 1998 to 2018. IBD cases were divided by those with

1  
2  
3 and without FN status. We included 116 FNs and 580 IBD cases from the general population.  
4 We compared their health care utilization after the date of IBD diagnosis. Compared to the  
5 general population diagnosed with IBD, we found that FNs had higher rates of being  
6 hospitalized due to IBD and due to diagnoses associated with IBD (e.g., weight loss, nausea,  
7 vomiting, etc.). FNs also had fewer IBD medication claims compared to the general population  
8 diagnosed with IBD. We did not observe differences in outpatient gastroenterology visits,  
9 colonoscopies, and surgeries for IBD. Our results show that, compared to the general population  
10 with IBD, FNs with the diagnosis of IBD have fewer medication claims for IBD. We also  
11 identified higher hospitalizations due to IBD among FN compared to individuals with IBD from  
12 the general population. FNs with IBD may not be receiving appropriate treatment for their  
13 disease, causing them to be hospitalized more often.  
14  
15  
16  
17  
18  
19  
20  
21  
22  
23  
24  
25  
26  
27  
28  
29  
30  
31  
32  
33  
34  
35  
36  
37  
38  
39  
40  
41  
42  
43  
44  
45  
46  
47  
48  
49  
50  
51  
52  
53  
54  
55  
56  
57  
58  
59  
60

Confidential

## Introduction

Oppression and racism are current problems faced by Indigenous peoples,<sup>1</sup> a population that continues to experience inequitably health outcomes compared to the Canadian general population (GP).<sup>2</sup> Indigenous peoples often access health care when they are experiencing more severe, complex health care challenges.<sup>3</sup> Health care disparities among Indigenous peoples is a problem previously studied.<sup>4-7</sup> However, little is known about access to care for inflammatory bowel disease (IBD) among Indigenous peoples. IBD, including Crohn's disease (CD) and ulcerative colitis (UC), is a chronic, idiopathic, and incurable disorder, causing inflammation of the gastrointestinal tract.<sup>8</sup> Canada has one of the highest prevalence and incidence rates of IBD in the world.<sup>9,10</sup> In 2018, 0.7% of Canadians lived with IBD.<sup>11</sup> By 2030, researchers estimate that 1% of the Canadian population will have IBD.<sup>11</sup> Our research group (IBD among Indigenous Peoples) reported that the prevalence of IBD among First Nations (FN), the largest Indigenous subgroup in Canada, doubled between 1999 and 2016 (from 64/100,000 to 142/100,000 population) in Saskatchewan and estimated an annual average increase of 4.2%.<sup>12</sup> Additionally, we observed stable IBD incidence rates among FNs, around 11 per 100,000 inhabitants.<sup>12</sup>

Indigenous patient and family advocates (IPFAs, Indigenous individuals living with IBD or family members of an Indigenous person with the disease) have manifested concerns about the access to IBD care,<sup>13</sup> and no studies have compared IBD health care utilization between FNs and the GP. Furthermore, half of FNs live on-reserve in Saskatchewan.<sup>14</sup> People with IBD in rural areas may not receive gastroenterologist care as often as those living with IBD in urban centres.<sup>15</sup> This issue may also impact the health of FNs living with IBD.<sup>15,16</sup> Therefore, we aimed to compare health care utilization (i.e., outpatient gastroenterologist visits, colonoscopies, IBD medication claims, and IBD-specific and -related hospitalizations, and surgeries for IBD) between FNs and individuals from the GP diagnosed with IBD in Saskatchewan.

## Methods

### Study population, setting, and design

A population-based retrospective cohort study was conducted in Saskatchewan between 1998/1999 and 2017/2018 fiscal years. This project was part of the "*Understanding and*

1  
2  
3 *advocating for miyo-māhcihowin among Indigenous Peoples living with IBD*” project, a patient-  
4 oriented research initiative of the IBD among Indigenous Peoples research group.<sup>12</sup>  
5  
6  
7

## 8 Patient Engagement

9  
10 IPFAs actively contributed to each stage of this project, from the study conception and  
11 design to the data analysis and knowledge sharing phases of our research. The opinions and  
12 perspectives of IPFAs had a considerable weight on the decision making towards the research  
13 process. For example, the study outcomes were chosen in close collaboration with IPFAs, and  
14 one of the IPFAs co-presented this work at three scientific conferences. The IPFAs received  
15 periodic reports and offered feedback on the results and interpretations. We also held research  
16 team meetings, had meals and coffee time together, and visited their communities.  
17  
18  
19  
20  
21  
22  
23

## 24 Data sources

25  
26 Administrative health databases from Saskatchewan were used, including the Person  
27 Health Registration System, hospital discharge abstracts, physician claims, and prescription  
28 medication claims. These databases capture all hospitalizations, outpatient physician visits  
29 (except those on reserve), and prescription medication claims in the province (regardless of the  
30 payer). Data were linked deterministically using the encrypted unique identifiers, extracted, and  
31 analyzed at the Saskatchewan Health Quality Council (HQC).  
32  
33  
34  
35

36 The algorithm developed by Bernstein et al<sup>17</sup> was applied to identify IBD cases using the  
37 International Classification of Diseases (ICD) codes (for CD, ICD-10-CA: K50 and ICD-9: 555;  
38 For UC, ICD-10-CA: K51 and ICD-9: 556). An IBD case had 1)  $\geq 5$  separate IBD contacts within  
39 2 years of health care coverage, or 2)  $\geq 3$  IBD contacts when having  $< 2$  years of health care  
40 coverage. This algorithm has evidence of a good sensitivity (74.4-89.2%) and specificity (89.8-  
41 93.7%) to identify CD and UC cases.<sup>17,18</sup> In addition, we previously used this case definition to  
42 determine the epidemiology of IBD among FNs in Saskatchewan.<sup>12</sup> The cases were classified as  
43 CD or UC according to the most frequent IBD diagnosis.<sup>12,19,20</sup>  
44  
45  
46  
47  
48  
49

50 All individuals 18 years and older covered by the Saskatchewan Ministry of Health and  
51 meeting the IBD case definition were considered. Only incident IBD cases were included in the  
52 study which were distinguished from prevalent ones by using an eight-year washout period. This  
53 eight-year washout period was chosen based on previous IBD epidemiological studies using  
54  
55  
56  
57  
58  
59  
60

1  
2  
3 administrative health data.<sup>20,21</sup> The self-declared FN status variable in the Person Health  
4 Registration System was used to classify individuals with IBD diagnosis in two groups, those  
5 with FN status and those from in GP.<sup>22</sup> Previous studies using Saskatchewan administrative  
6 databases have used such a method to include FN people.<sup>12,23,24</sup>  
7  
8  
9

10 Our primary study outcome was IBD health care utilization assessed by measuring: 1)  
11 outpatient gastroenterologist visit, 2) colonoscopy, 3) prescription medication claims for IBD, 4)  
12 IBD-specific, 5) IBD-related hospitalizations, and 6) surgeries for IBD. These outcomes were  
13 measured after IBD diagnosis (i.e., first eligible health care contact of the case definition). We  
14 consider the codes of surgeries for IBD in the Canadian Classification of Diagnostic,  
15 Therapeutic, and Surgical Procedures and the Canadian Classification of Health  
16 Interventions,<sup>15,25</sup> as well the codes for colonoscopies. We used the drug identification numbers  
17 of the medications for IBD, including biologic (e.g., infliximab, adalimumab, golimumab,  
18 certolizumab, vedolizumab, and ustekinumab), immunomodulator (e.g., azathioprine,  
19 mercaptopurine, and methotrexate), and 5-ASA (e.g., mesalamine, sulfasalazine, and olsalazine  
20 sodium) in the prescription claims dataset. Furthermore, time from the date of IBD diagnosis to  
21 each of the study outcomes was measured. The list of used databases and codes can be found in  
22 Appendix 1.  
23  
24  
25  
26  
27  
28  
29  
30  
31  
32  
33

### 34 Statistical analysis

35  
36 FN and the GP groups were matched 1:5 based on age and sex; the caliper for age was 5  
37 years. Unadjusted and multivariable Cox proportional regression models were used to identify  
38 differences between these groups in outpatient gastroenterologist visits, colonoscopy, medication  
39 claims, IBD-specific and -related hospitalization, and surgeries for IBD. Time was measured in  
40 years from IBD diagnosis and terminated by either the time of the first event or censoring.  
41 Hazard ratios (HRs) and corresponding 95% confidence intervals (95%CI) were reported.  
42  
43  
44  
45

46 Models were adjusted by rural or urban status and diagnosis type. IBD cases with a  
47 residential postal code at the date of diagnosis within a Census Metropolitan Areas or Census  
48 Agglomeration of 15,000 or more inhabitants were labelled as having urban status.<sup>20,26</sup> Income  
49 quintile, region of residence (i.e., Regina/Saskatoon and surrounding areas, Northern, and  
50 Southern Saskatchewan), age at IBD diagnosis, and sex were tested as confounding variables. A  
51 set of health care utilization variables (i.e., number of visits to a general practitioner, outpatient  
52  
53  
54  
55  
56  
57  
58  
59  
60

1  
2  
3 visits with specialists, and IBD medication claims),<sup>19,27</sup> corticosteroid dependency (CsDep),<sup>19,28</sup>  
4 and Charlson's Comorbidity index<sup>29</sup> were measured in the year before of IBD diagnosis and  
5 evaluated as potential confounding variables. CsDep was considered as proxy measure of disease  
6 severity<sup>19,27</sup> and defined as having two or more prescriptions of oral corticosteroids within six  
7 months.<sup>19,28</sup> A potential confounder was retained in the final model if its inclusion changed  
8 coefficients of other variables by >10%.<sup>30,31</sup> A stratified analysis was completed by type of  
9 disease (UC and CD).

10  
11 As a sensitivity analysis, two different case definitions of IBD were used to evaluate  
12 variations in the identified associations. Two additional IBD incident cohorts were created using  
13 the case definitions of Rezaie et al.<sup>32</sup> and Benchmiol et al.<sup>21</sup>, Appendix 2. After applying the  
14 matching procedure used in the main cohort, adjusted HRs were calculated for each study  
15 outcome in the different cohorts.

16  
17 A two-sided p-value <0.05 was considered statistically significant. Data analyses was  
18 conducted using SAS 9.4 (SAS Institute, Cary, NC).

## 29 Ethics

30  
31 Anonymized data of the Saskatchewan Ministry of Health and eHealth were accessed at a  
32 HQC secure location. Aggregated results were transferred. This project received approval from  
33 the Research Ethics Board of the University of Saskatchewan (Beh-REB 977).

## 39 Results

40  
41 A matched cohort with 696 incident cases was created, 580 IBD cases from the GP and  
42 116 from the FN group (Figure 1). Compared to the GP with the diagnosis of IBD, FN  
43 individuals tended to be in the lower income quintiles, live in rural and Northern Saskatchewan,  
44 and to be diagnosed with UC (Table 1). The number of events of each outcome are reported in  
45 Table 2.

46  
47 The unadjusted models revealed differences between FN and the GP in having a  
48 prescription medication claims for biologic (HR=0.58, 95%CI:0.34-0.99) and 5-ASA (HR=0.68,  
49 95%CI:0.54-0.85) therapies, and differences in having a colonoscopy (HR=0.58, 95%CI 0.47-  
50 0.73) and an IBD-related hospitalization (HR=1.45, 95%CI:1.12-1.87) (Table 3).



1  
2  
3 In the adjusted analyses by rural or urban residence at IBD diagnosis and diagnosis type,  
4 the hazard rate was 48% lower to first IBD medication claim (HR=0.52, 95%CI:0.41-0.65) and  
5 44% lower to the first 5-ASA medication claims in the FN group (HR=0.56, 95%CI:0.45-0.71)  
6 compared to the GP. Additionally, FN had 33% higher hazard rates of having an IBD-specific  
7 hospitalization (HR=1.33, 95%CI:1.01-1.75) and 55% of having an IBD-related hospitalization  
8 (HR=1.55, 95%CI:1.20-2.01). None of the potential confounders changed regression estimates  
9 >10% and were not retained in the final model.<sup>30,31</sup>

15 In the stratified analysis by disease type (Table 3), FN with CD and UC had fewer  
16 medication claims for IBD (CD HR=0.51, 95%CI:0.34-0.76; UC HR=0.51, 95%CI: 0.39-0.68)  
17 and a 5-ASA claims (CD HR=0.56, 95%CI:0.36-0.86; UC HR=0.54, 95%CI:0.41-0.72) than  
18 individual with IBD from the GP. Also, differences were observed for IBD-related  
19 hospitalizations (HR=1.68, 95%CI:1.14-2.46) in the CD group.

22 The sensitivity analysis with the matched cohort using Rezaie et al.<sup>32</sup> case definition  
23 (matched cohort #2) included 990 IBD incident cases whose 165 belonged to the FN group, and  
24 825 were from the GP. The HRs from matched cohort #2 demonstrated similar strengths and  
25 directions of associations compared to those in the main analysis (Appendix 3). The matched  
26 cohort using Benchimol et al.<sup>21</sup> case definition (matched cohort #3) obtained 708 IBD incident  
27 cases, with 118 from the FN group and 590 from the GP. The analysis using this case definition  
28 also attested to the robustness of the study findings (Appendix 4).

## 37 Interpretation

38 FN had a higher hazard rate of having an IBD-specific and IBD-related hospitalization  
39 than the GP. Additionally, FN had fewer prescription claims for any IBD medication and 5-ASA  
40 compared to the GP.

41 In agreement with the evidence of increased hospitalization risks for FN with other  
42 chronic conditions (myocardial infarction and congestive heart failure,<sup>6</sup> and chronic kidney  
43 disease<sup>7</sup>), we identified higher hospitalization hazard rates due to IBD.

44 FNs had lower IBD prescription claims compared to the GP. Some hypotheses to explain  
45 this finding could be: 1) a shorter follow-up time in the FN group could result in lower  
46 medication claims, 2) an association confounded by disease severity, 3) a preference to use  
47 traditional medicines; 4) barriers due to differences in access/coverage criteria for prescription



1  
2  
3 medications; and 5) experiences related to systematic racism. Given that we also identified  
4 higher IBD-specific and IBD-related hospitalization hazard rates among FNs, these results may  
5 suggest that FNs with IBD are not receiving appropriate treatments for their disease resulting in  
6 increased rates of hospitalizations. These results call for a change in the context of the social  
7 determinants of health, the inequities that exist within the health care system and “who” has and  
8 “who” does not have access to a more streamlined, optimal, health care.<sup>33,34</sup> A potential  
9 explanation for FN not having prescription medication claims for IBD involves systemic  
10 challenges that are embedded in racist protocols and processes in health care. For example, FN  
11 may have faced lack of coverage by Non-Insured Health Benefits (NIHB), lack of understanding  
12 about the NIHB coverage and claim process, or simply NIHB rejection of coverage,<sup>35</sup> which is in  
13 general more limited and restrictive than provincial coverage for the general population.  
14  
15

16  
17  
18  
19  
20  
21  
22 These results speak to more action in the light of the Truth and Reconciliation  
23 Commission (TRC) Calls to Action, anti-racist practices in the health care system, and proper  
24 addressing of the root causes of the health care inequities for FN with IBD. Further studies  
25 should continue evaluating access to IBD care (including navigation and cultural safety in health  
26 care systems), medication use, and disease severity among FN with IBD. Despite the Royal  
27 Commission on Aboriginal Peoples and the TRC that aimed to improve the health of Indigenous  
28 peoples, there is still a long way to go in order to promote cultural safety in health care.<sup>36–38</sup>  
29 Patient navigation could also help FN to obtain early access to health care services and help  
30 reduce health care disparities.<sup>39,40</sup>  
31  
32  
33  
34  
35  
36  
37

38  
39  
40  
41  
42  
43  
44  
45  
46  
47  
48  
49  
50  
51  
52  
53  
54  
55  
56  
57  
58  
59  
60

Based on the study results, IPFAs in the research team highlighted the need to improve access to specialized care for FN living with IBD. The IPFA considered that FN communities are more exposed to westernized diet and need more traditional and spiritual care along with westernized medicine. IPFAs also suggested that poor housing and water/food insecurity on reserves should be considered when studying IBD among FN. IPFA stressed that racism and poor living conditions leading to poorer mental health (e.g., stress, anxiety, depression) might also place FN living with IBD at a greater disadvantage. FNs with IBD could advocate for themselves with more awareness and education about this disease.

Lessons learned from working with IPFAs

1  
2  
3 Promoting reconciliation and healing was evidenced through bonding with the IPFAs,  
4 appreciation, and learning about Indigenous cultures and the prioritization of IPFAs'  
5 perspectives and recommendations. We also ensured an inclusive and collaborative research  
6 environment. The research team also learned that there are different ways forward in advocating  
7 for the health of FN and that the study results have application in the light of systematic racism  
8 and oppression. The Covid-19 pandemic restrictions limited in-person interactions; although,  
9 research team members have communicated regularly via videoconference, telephone calls, and  
10 text messages.  
11  
12  
13  
14  
15  
16  
17

### 18 Limitations

19 Misclassification bias can be a potential issue when using health administrative data to  
20 study chronic diseases such as IBD.<sup>20,41</sup> Mistakes can be originated from data entry.<sup>41</sup> A  
21 validated case definition that required multiple health care contacts with the diagnosis of IBD  
22 diagnosis was applied to address this potential issue.<sup>17</sup> A sensitivity analysis was also completed  
23 using two additional validated IBD case definitions.<sup>21,32</sup> Moreover, the used FN status variable  
24 could account for those self-declared FN in the administrative health databases. Another  
25 limitation comes from using Indigenous-specific health information in health systems. This data  
26 may not have been collected in a culturally appropriate way and may be compromised due to  
27 factors such as misclassification errors and non-response bias, leading to an underestimation of  
28 Indigenous health issues.<sup>42</sup> Finally, disease severity and disease management data are not  
29 available in administrative health data and may confound IBD health care utilization and  
30 medication claims. We considered multiple health care utilization variables in the year before  
31 IBD diagnosis as proxy measures of disease severity,<sup>19,27</sup> although, these variables did not have  
32 an impact on the observed associations.  
33  
34  
35  
36  
37  
38  
39  
40  
41  
42  
43  
44

### 45 Conclusions

46 This study identified that FN diagnosed with IBD have higher hazard rates of IBD-  
47 specific and -related hospitalization compared to the GP diagnosed with IBD. Additionally, an  
48 inverse association between FN status and having prescription medication claims for IBD and 5-  
49 ASA was found. These associations might reflect a barrier to access IBD medications,  
50 contributing to a higher hazard rate for IBD-specific or -related hospitalizations in the FN group.  
51  
52  
53  
54  
55  
56  
57  
58  
59  
60

Further studies should continue evaluating access to IBD care among FN and other Indigenous peoples living with IBD to improve care and address health disparities.

## References

1. Paradies Y. Colonisation, racism and indigenous health. *J Popul Res* [Internet]. 2016 Mar 18;33(1):83–96. Available from: <http://link.springer.com/10.1007/s12546-016-9159-y>
2. Morrison TG, Morrison MA, Borsa T. A legacy of derogation: prejudice toward Aboriginal Persons in Canada. *Psychology* [Internet]. 2014;05(09):1001–10. Available from: <http://www.scirp.org/journal/doi.aspx?DOI=10.4236/psych.2014.59112>
3. Horrill T, McMillan DE, Schultz ASH, Thompson G. Understanding access to healthcare among Indigenous peoples: A comparative analysis of biomedical and postcolonial perspectives. *Nurs Inq* [Internet]. 2018 Jul;25(3):e12237. Available from: <http://doi.wiley.com/10.1111/nin.12237>
4. Yeates K, Tonelli M. Chronic kidney disease among Aboriginal people living in Canada. *Clin Nephrol* [Internet]. 2010 Nov;74 Suppl 1:S57-60. Available from: <http://www.ncbi.nlm.nih.gov/pubmed/20979965>
5. Lafond G, Haver CRA, McLeod V, Clarke S, Horsburgh B, McLeod KM. Characteristics and residence of First Nations patients and their use of health care services in Saskatchewan, Canada: informing First Nations and Métis health services. *J Eval Clin Pract* [Internet]. 2017 Apr 15;23(2):294–300. Available from: <https://onlinelibrary.wiley.com/doi/abs/10.1111/jep.12601>
6. Schultz A, Dahl L, McGibbon E, Brownlie J, Cook C, Elbarouni B, et al. Differences in coronary artery disease complexity and associations with mortality and hospital admissions among First Nations and non-First Nations patients undergoing angiography: a comparative retrospective matched cohort study. *CMAJ Open* [Internet]. 2020 Oct 2;8(4):E685–94. Available from: <http://cmajopen.ca/lookup/doi/10.9778/cmajo.20190171>
7. Gao S. Chronic kidney disease among First Nations people in Alberta: prevalence, health services utilization and access to quality care. *ProQuest Diss Theses* [Internet]. 2006;113. Available from: <https://search.proquest.com/docview/305361475?accountid=14660>
8. Kappelman MD, Porter CQ, Galanko JA, Rifas-Shiman SL, Ollendorf DA, Sandler RS, et al. Utilization of healthcare resources by U.S. children and adults with inflammatory bowel disease. *Inflamm Bowel Dis* [Internet]. 2011 Jan;17(1):62–8. Available from: <https://academic.oup.com/ibdjournal/article/17/1/62-68/4631080>
9. Molodecky NA, Soon INGS, Rabi DM, Ghali WA, Ferris M, Chernoff G, et al. Increasing incidence and prevalence of the inflammatory bowel diseases with time, based on systematic review. *YGAST*. 2012;142(1):46-54.e42.
10. Benchimol EI, Walters TD, Kaufman M, Frost K, Fiedler K, Chinea Z, et al. Assessment of knowledge in adolescents with inflammatory bowel disease using a novel transition tool. *Inflamm Bowel Dis*. 2011;17(5):1131–7.
11. Coward S, Clement F, Benchimol EI, Bernstein CN, Avina-Zubieta JA, Bitton A, et al. Past and future burden of inflammatory bowel diseases based on modeling of population-based data. *Gastroenterology* [Internet]. 2019 Apr;156(5):1345-1353.e4. Available from: <https://linkinghub.elsevier.com/retrieve/pii/S0016508519300216>

12. Peña-Sánchez JN, Osei JA, Santos JDM, Jennings D, Andkhoie M, Brass C, et al. Increasing prevalence and stable incidence rates of inflammatory bowel disease among First Nations: population-based evidence from a Western Canadian province. *Inflamm Bowel Dis* [Internet]. 2021 May 25;XX:1–9. Available from: <https://academic.oup.com/ibdjournal/advance-article/doi/10.1093/ibd/izab096/6284047>
13. Santos JDM, Brass C, Sanderson R, Pena-Sanchez JN. Storytelling: amplifying the voices of Indigenous people in the search for IBD care [video file]. 2020 Mar 4 [cited 2021 Mar 13]. [Internet]. Available from: <https://www.youtube.com/watch?v=N7iNft90m4I&t=0s>
14. Statistics Canada. Focus on Geography Series, 2016 Census, Aboriginal Peoples, province of Saskatchewan [Internet]. 2016. Available from: <https://www12.statcan.gc.ca/census-recensement/2016/as-sa/fogs-spg/Facts-PR-Eng.cfm?TOPIC=9&LANG=Eng&GK=PR&GC=47>
15. Benchimol EI, Kuenzig ME, Bernstein CN, Nguyen GC, Guttman A, Jones JL, et al. Rural and urban disparities in the care of Canadian patients with inflammatory bowel disease: a population-based study. *Clin Epidemiol* [Internet]. 2018 Nov;Volume 10:1613–26. Available from: <https://www.dovepress.com/rural-and-urban-disparities-in-the-care-of-canadian-patients-with-infl-peer-reviewed-article-CLEP>
16. Brierley CK, Suarez N, Arora G, Graham D. Healthcare access and health beliefs of the indigenous peoples in remote Amazonian Peru. *Am J Trop Med Hyg* [Internet]. 2014 Jan 8;90(1):180–3. Available from: <http://www.ajtmh.org/content/journals/10.4269/ajtmh.13-0547>
17. Bernstein CN, Blanchard JF, Rawsthorne P, Wajda A. Epidemiology of Crohn’s disease and ulcerative colitis in a central Canadian province: a population-based study. *Am J Epidemiol* [Internet]. 1999 May 15;149(10):916–24. Available from: <https://academic.oup.com/aje/article-lookup/doi/10.1093/oxfordjournals.aje.a009735>
18. Bernstein CN, Wajda A, Svenson LW, MacKenzie A, Koehoorn M, Jackson M, et al. The epidemiology of inflammatory bowel disease in Canada: a population-based study. *Am J Gastroenterol* [Internet]. 2006 Jul;101(7):1559–68. Available from: <http://www.nature.com/doifinder/10.1111/j.1572-0241.2006.00603.x>
19. Peña-Sánchez JN, Lix LM, Teare GF, Li W, Fowler SA, Jones JL. Impact of an integrated model of care on outcomes of patients with inflammatory bowel diseases: evidence from a population-based study. *J Crohn’s Colitis* [Internet]. 2017 Dec 4;11(12):1471–9. Available from: <http://academic.oup.com/ecco-jcc/article/11/12/1471/4060514>
20. Osei JA, Peña-Sánchez JN, Fowler SA, Muhajarine N, Kaplan GG, Lix LM. Population-based evidence from a Western Canadian province of the decreasing incidence rates and trends of inflammatory bowel disease among adults. *J Can Assoc Gastroenterol* [Internet]. 2020 Aug 21; Available from: <https://academic.oup.com/jcag/advance-article/doi/10.1093/jcag/gwaa028/5895259>
21. Benchimol EI, Guttman A, Mack DR, Nguyen GC, Marshall JK, Gregor JC, et al. Validation of international algorithms to identify adults with inflammatory bowel disease in health administrative data from Ontario, Canada. *J Clin Epidemiol*. 2014 Aug;67(8):887–96.
22. Government of Canada. What is Indian status? [Internet]. 2018. Available from: <https://www.sac-isc.gc.ca/eng/1100100032463/1572459644986>
23. Dyck R, Osgood N, Lin TH, Gao A, Stang MR. Epidemiology of diabetes mellitus among First Nations and non-First Nations adults. *Can Med Assoc J* [Internet]. 2010 Feb

- 23;182(3):249–56. Available from: <http://www.cmaj.ca/cgi/doi/10.1503/cmaj.090846>
24. Hernández-Ronquillo L, Thorpe L, Pahwa P, Téllez-Zenteno JF. Secular trends and population differences in the incidence of epilepsy. A population-based study from Saskatchewan, Canada. *Seizure* [Internet]. 2018 Aug;60:8–15. Available from: <https://linkinghub.elsevier.com/retrieve/pii/S1059131118302036>
  25. Ma C, Crespín M, Proulx M-C, DeSilva S, Hubbard J, Prusinkiewicz M, et al. Postoperative complications following colectomy for ulcerative colitis: a validation study. *BMC Gastroenterol* [Internet]. 2012 Dec 27;12(1):39. Available from: <http://bmcgastroenterol.biomedcentral.com/articles/10.1186/1471-230X-12-39>
  26. Benchimol EI, Kaplan GG, Otley AR, Nguyen GC, Underwood FE, Guttman A, et al. Rural and urban residence during early life is associated with risk of inflammatory bowel disease: a population-based inception and birth cohort study. *Am J Gastroenterol* [Internet]. 2017 Sep;112(9):1412–22. Available from: <http://journals.lww.com/00000434-201709000-00016>
  27. Melesse DY, Lix LM, Nugent Z, Targownik LE, Singh H, Blanchard JF, et al. Estimates of disease course in inflammatory bowel disease using administrative data: a population-level study. *J Crohn's Colitis* [Internet]. 2016 Nov 4;jjw201. Available from: <https://academic.oup.com/ecco-jcc/article-lookup/doi/10.1093/ecco-jcc/jjw201>
  28. Munkholm P, Langholz E, Davidsen M, Binder V. Frequency of glucocorticoid resistance and dependency in Crohn's disease. *Gut* [Internet]. 1994 Mar 1;35(3):360–2. Available from: <https://gut.bmj.com/lookup/doi/10.1136/gut.35.3.360>
  29. Needham DM, Scales DC, Laupacis A, Pronovost PJ. A systematic review of the Charlson comorbidity index using Canadian administrative databases: a perspective on risk adjustment in critical care research. *J Crit Care*. 2005 Mar;20(1):12–9.
  30. Mickey RM, Greenland S. The impact of confounder selection criteria on effect estimation. *Am J Epidemiol* [Internet]. 1989 Jan 1 [cited 2022 Feb 12];129(1):125–37. Available from: <https://academic.oup.com/aje/article/129/1/125/58697>
  31. Maldonado G, Greenland S. Simulation Study of Confounder-Selection Strategies. *Am J Epidemiol* [Internet]. 1993 Dec 1 [cited 2022 Feb 12];138(11):923–36. Available from: <https://academic.oup.com/aje/article/138/11/923/122634>
  32. Rezaie A, Quan H, Fedorak RN, Panaccione R, Hilsden RJ. Development and validation of an administrative case definition for inflammatory bowel diseases. *Can J Gastroenterol* [Internet]. 2012 Oct;26(10):711–7. Available from: <http://www.hindawi.com/journals/cjgh/2012/278495/>
  33. National Collaborating Centre for Indigenous Health. Social determinants of health: access to health services as a social determinant of First Nations, Inuit and Metis Health [Internet]. National Collaborating Centre for Indigenous Health. 2019. Available from: <https://www.nccih.ca/docs/determinants/FS-AccessHealthServicesSDOH-2019-EN.pdf>
  34. Douglas V. An introduction to Indigenous Health and healthcare in Canada [Internet]. 2nd ed. New York, NY: Springer Publishing Company; 2020. Available from: <http://connect.springerpub.com/lookup/doi/10.1891/9780826164131>
  35. First Nations Information Governance Centre [FNIGC]. National report of the First Nations Regional Health Survey Phase 3: Volume Two [Internet]. Ottawa, ON; 2018. Available from: [https://fnigc.ca/wp-content/uploads/2020/09/fnigc\\_rhs\\_phase\\_3\\_volume\\_two\\_en\\_final\\_screen.pdf](https://fnigc.ca/wp-content/uploads/2020/09/fnigc_rhs_phase_3_volume_two_en_final_screen.pdf)
  36. Reading J, Loppie C, O'Neil J. Indigenous health systems governance. *Int J Heal Gov*

- 1  
2  
3 [Internet]. 2016 Dec 5;21(4):222–8. Available from:  
4 <https://www.emerald.com/insight/content/doi/10.1108/IJHG-08-2016-0044/full/html>  
5 37. Barlow K, Loppie C, Jackson R, Akan M, Maclean L, Reimer G. Culturally competent  
6 service provision issues experienced by Aboriginal People living with HIV/AIDS.  
7 Pimatisiwin [Internet]. 2008;6(2):155–80. Available from:  
8 <http://www.ncbi.nlm.nih.gov/pubmed/20835301>  
9  
10 38. Hammond C, Thomas R, Gifford W, Poudrier J, Hamilton R, Brooks C, et al. Cycles of  
11 silence: First Nations women overcoming social and historical barriers in supportive  
12 cancer care. Psychooncology [Internet]. 2017 Feb;26(2):191–8. Available from:  
13 <http://doi.wiley.com/10.1002/pon.4335>  
14  
15 39. Soto-Perez-de-Celis E, Chavarri-Guerra Y, Ramos-Lopez WA, Alcalde-Castro J,  
16 Covarrubias-Gomez A, Navarro-Lara Á, et al. Patient navigation to improve early access  
17 to supportive care for patients with advanced cancer in resource-limited settings: a  
18 randomized controlled trial. Oncologist. 2021;26(2):157–64.  
19  
20 40. Natale-Pereira A, Enard KR, Nevarez L, Jones LA. The role of patient navigators in  
21 eliminating health disparities. Cancer [Internet]. 2011 Aug 1;117(S15):3541–50.  
22 Available from: <http://doi.wiley.com/10.1002/cncr.26264>  
23  
24 41. Manuel DG, Rosella LC, Stukel TA. Importance of accurately identifying disease in  
25 studies using electronic health records. BMJ [Internet]. 2010 Aug 19;341(aug19 1):c4226–  
26 c4226. Available from: <https://www.bmj.com/lookup/doi/10.1136/bmj.c4226>  
27  
28 42. Smylie J, Firestone M. Back to the basics: Identifying and addressing underlying  
29 challenges in achieving high quality and relevant health statistics for Indigenous  
30 populations in Canada. Stat J IAOS [Internet]. 2015;31(1):67–87. Available from:  
31 <https://www.medra.org/servlet/aliasResolver?alias=iospress&doi=10.3233/SJI-150864>  
32  
33  
34  
35  
36  
37  
38  
39  
40  
41  
42  
43  
44  
45  
46  
47  
48  
49  
50  
51  
52  
53  
54  
55  
56  
57  
58  
59  
60



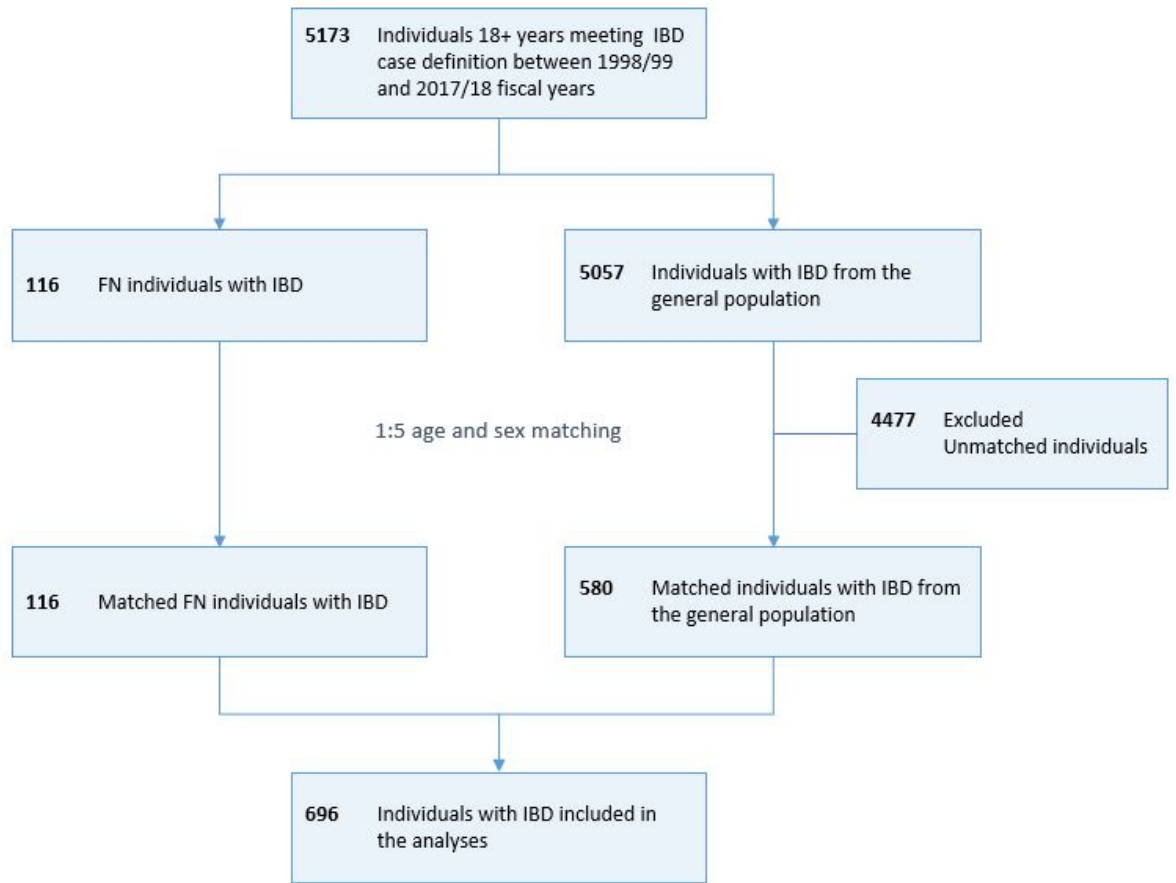

**Figure 1.** Flow diagram of the study cohort. The caliper used for age was 5 years.



**Table 1 - Sample characteristics**

|                                                      | <b>Group</b>                      |                                            |                                   |
|------------------------------------------------------|-----------------------------------|--------------------------------------------|-----------------------------------|
|                                                      | <b>Matched cohort<br/>[n=696]</b> | <b>General<br/>population [n=<br/>580]</b> | <b>First Nations<br/>[n= 116]</b> |
| <b>Age at diagnosis of IBD, mean [SD],<br/>years</b> | 41.44 [14.8]                      | 41.48 [14.7]                               | 41.21 [15.1]                      |
| <b>Age groups, No. [%]</b>                           |                                   |                                            |                                   |
| ≤30                                                  | 157 [22.6]                        | 130 [22.4]                                 | 27 [23.3]                         |
| 31-49                                                | 346 [49.7]                        | 287 [49.5]                                 | 59 [50.9]                         |
| ≥50                                                  | 193 [27.7]                        | 163 [28.1]                                 | 30 [25.9]                         |
| <b>Sex, n[%]</b>                                     |                                   |                                            |                                   |
| Female                                               | 414 [59.5]                        | 345 [59.5]                                 | 69 [59.5]                         |
| Male                                                 | 282 [40.5]                        | 235 [40.5]                                 | 47 [40.5]                         |
| <b>Income quintiles,* No. [%]</b>                    |                                   |                                            |                                   |
| 1 (Lowest)                                           | 101 [15.4]                        | 62 [11.3]                                  | 39 [36.1]                         |
| 2                                                    | 150 [22.8]                        | 130 [22.6]                                 | 20 [18.5]                         |
| 3                                                    | 130 [19.8]                        | 113 [20.6]                                 | 17 [15.7]                         |
| 4                                                    | 156 [23.7]                        | 137 [24.9]                                 | 19 [17.6]                         |
| 5 (Highest)                                          | 121 [18.4]                        | 108 [19.6]                                 | 13 [12.0]                         |
| <b>Residence,** No. [%]</b>                          |                                   |                                            |                                   |
| Rural                                                | 239 [34.6]                        | 190 [33.0]                                 | 49 [42.2]                         |
| Urban                                                | 452 [65.4]                        | 385 [67.0]                                 | 67 [57.8]                         |
| <b>Region of residence,*** No. [%]</b>               |                                   |                                            |                                   |
| Regina, Saskatoon, and surrounding                   | 353 [50.8]                        | 305 [52.7]                                 | 48 [41.4]                         |
| Northern Saskatchewan                                | 146 [21.0]                        | 97 [16.8]                                  | 49 [42.2]                         |
| Southern Saskatchewan                                | 196 [28.2]                        | 177 [30.6]                                 | 19 [16.4]                         |
| <b>Diagnosis type, No. [%]</b>                       |                                   |                                            |                                   |
| Crohn's Disease                                      | 342 [49.1]                        | 300 [51.7]                                 | 42 [36.2]                         |
| Ulcerative Colitis                                   | 354 [50.9]                        | 280 [48.3]                                 | 74 [63.8]                         |
| <b>Length of follow-up, mean [SD], years</b>         | 10.74 [5.51]                      | 11.13 [5.44]                               | 8.78 [5.43]                       |

IBD: inflammatory bowel disease, SD: standard deviation

\* Data of income quintile not available for all subjects [missing values=38]. \*\* Data of rural or urban residence not available for all subjects [missing values=5]. \*\*\* Data of region of residence not available for all subjects [missing values=1].

**Table 2** - Number of study outcomes observed in the general population and First Nation groups after the date of IBD diagnosis.

|                                            | <b>Matched cohort<br/>[n=696]</b> | <b>General population<br/>[n=580]</b> | <b>First Nations<br/>[n=116]</b> |
|--------------------------------------------|-----------------------------------|---------------------------------------|----------------------------------|
| <b>Outpatient gastroenterologist visit</b> | 579                               | 485                                   | 94                               |
| <b>Colonoscopy</b>                         | 610                               | 504                                   | 106                              |
| <b>Prescription claim for IBD</b>          | 610                               | 518                                   | 92                               |
| <b>Prescription claim of a Biologic</b>    | 160                               | 145                                   | 15                               |
| <b>Prescription claim of an IM</b>         | 264                               | 232                                   | 32                               |
| <b>Prescription claim of a 5-ASA</b>       | 560                               | 472                                   | 88                               |
| <b>IBD-specific hospitalization</b>        | 349                               | 286                                   | 63                               |
| <b>IBD-related hospitalization</b>         | 380                               | 306                                   | 74                               |
| <b>Surgery for IBD</b>                     | 230                               | 194                                   | 36                               |

IBD: inflammatory bowel disease, IM: immune modulator, 5-ASA: 5-aminosalicylic acid,

**Table 3** Measures of association between First Nation status (reference general population) and each of the study outcomes

| Outcomes                            | Full-group analysis<br>(n=696) |                            | Stratified analysis      |                             |                               |                                  |
|-------------------------------------|--------------------------------|----------------------------|--------------------------|-----------------------------|-------------------------------|----------------------------------|
|                                     | Unadjusted<br>HR<br>(95%CI)    | Adjusted<br>HR<br>(95%CI)* | Crohn's Disease (n=342)  |                             | Ulcerative Colitis<br>(n=354) |                                  |
|                                     |                                |                            | Unadjusted<br>HR (95%CI) | Adjusted<br>HR<br>(95%CI)** | Unadjusted<br>HR<br>(95%CI)   | Adjusted<br>HR<br>(95%CI)**<br>* |
| Outpatient gastroenterologist visit | 1.10 (0.88-1.37)               | 1.13 (0.90-1.41)           | 0.95 (0.65-1.39)         | 0.99 (0.67-1.45)            | 1.22 (0.92-1.61)              | 1.20 (0.91-1.59)                 |
| Colonoscopy                         | <b>1.25 (1.01-1.54)</b>        | 1.14 (0.92-1.41)           | 1.19 (0.83-1.72)         | 1.20 (0.83-1.73)            | 1.11 (0.86-1.45)              | 1.11 (0.85-1.44)                 |
| Prescription claim for IBD          | <b>0.58 (0.47-0.73)</b>        | <b>0.52 (0.41-0.65)</b>    | <b>0.53 (0.35-0.78)</b>  | <b>0.51 (0.34-0.76)</b>     | <b>0.52 (0.39-0.68)</b>       | <b>0.51 (0.39-0.68)</b>          |
| Prescription claim of a Biologic    | <b>0.58 (0.34-0.99)</b>        | 0.65 (0.38-1.11)           | 0.67 (0.33-1.38)         | 0.67 (0.32-1.37)            | 0.61 (0.28-1.35)              | 0.62 (0.28-1.36)                 |
| Prescription claim of an IM         | 0.70 (0.48-1.01)               | 0.79 (0.55-1.15)           | 0.68 (0.40-1.15)         | 0.69 (0.40-1.17)            | 0.93 (0.55-1.57)              | 0.93 (0.55-1.58)                 |
| Prescription claim of a 5-ASA       | <b>0.68 (0.54-0.85)</b>        | <b>0.56 (0.45-0.71)</b>    | <b>0.60 (0.39-0.92)</b>  | <b>0.56 (0.36-0.86)</b>     | <b>0.54 (0.41-0.72)</b>       | <b>0.54 (0.41-0.72)</b>          |
| IBD-specific hospitalization        | 1.24 (0.94-1.63)               | <b>1.33 (1.01-1.75)</b>    | <b>1.55 (1.04-2.30)</b>  | 1.50 (1.00-2.23)            | 1.18 (0.80-1.72)              | 1.17 (0.80-1.71)                 |
| IBD-related hospitalization         | <b>1.45 (1.12-1.87)</b>        | <b>1.55 (1.20-2.01)</b>    | <b>1.74 (1.19-2.54)</b>  | <b>1.68 (1.14-2.46)</b>     | 1.42 (1.00-2.01)              | 1.41 (1.00-2.00)                 |
| Surgery for IBD                     | 1.13 (0.79-1.62)               | 1.14 (0.80-1.64)           | 0.95 (0.52-1.72)         | 0.93 (0.51-1.70)            | 1.32 (0.84-2.07)              | 1.30 (0.83-2.05)                 |

HR: hazard ratio, 95%CI: 95% confidence interval

\* Models adjusted by rural or urban status, and diagnosis type (n=691).

\*\* Crohn's Disease group, models adjusted by rural/urban status (n=339).

\*\*\* Ulcerative colitis group, models adjusted by rural/urban status (n=352).

## Appendices

### Appendix 1–List of codes used to identify the study outcomes.

**Table A:** List of codes used to identify IBD-specific and IBD-related hospitalizations in the hospital discharge abstracts database. IBD-related diagnoses refer to all diagnostic codes, including the IBD-specific codes. This code list was developed by Benchimol et al., 2018.\*

| CONDITION                                                                                                                                                                                                                                                                                                                                                     | ICD-9  | ICD-10                                             |
|---------------------------------------------------------------------------------------------------------------------------------------------------------------------------------------------------------------------------------------------------------------------------------------------------------------------------------------------------------------|--------|----------------------------------------------------|
| <b>IBD-SPECIFIC:</b>                                                                                                                                                                                                                                                                                                                                          |        |                                                    |
| Crohn's                                                                                                                                                                                                                                                                                                                                                       | 555.x  | K50.x                                              |
| UC                                                                                                                                                                                                                                                                                                                                                            | 556.x  | K51.x                                              |
| <b>IBD SIGNS/SYMPTOMS:</b>                                                                                                                                                                                                                                                                                                                                    |        |                                                    |
| Anorexia                                                                                                                                                                                                                                                                                                                                                      | 783.0  | R63.0                                              |
| Abnormal Weight Gain                                                                                                                                                                                                                                                                                                                                          | 783.1  | R63.5                                              |
| Abnormal Weight Loss                                                                                                                                                                                                                                                                                                                                          | 783.2  | R63.4                                              |
| Underweight                                                                                                                                                                                                                                                                                                                                                   | 783.22 | R62.8                                              |
| Failure to thrive, child                                                                                                                                                                                                                                                                                                                                      | 783.4  | R62.8<br>R62.9                                     |
| Failure to thrive, adult                                                                                                                                                                                                                                                                                                                                      | 783.7  | R62.8<br>R62.9                                     |
| Symptoms involving digestive system, including:<br>(787.0) Nausea and vomiting (787.01)<br>Nausea w/vomiting<br>(787.02) Nausea, alone<br>(787.03) Vomiting, alone<br>(787.1) Heartburn<br>(787.2) Dysphagia<br>(787.3) Gas/bloating<br>(787.6) Encopresis, fecal incontinence<br>(787.9) Other symptoms involving digestive system (787.91)<br>Diarrhea, NOS | 787.x  | R11.x<br>R12.x<br>R13.x<br>R14.x<br>R15.x<br>R19.x |
| Abdominal pain                                                                                                                                                                                                                                                                                                                                                | 789.0  | R10.x                                              |
| Dyspepsia                                                                                                                                                                                                                                                                                                                                                     | 536.8  | K30.x                                              |
| Cachexia                                                                                                                                                                                                                                                                                                                                                      | 799.4  | R64.x                                              |
| Esophagitis                                                                                                                                                                                                                                                                                                                                                   | 530.1  | K20.x<br>K21.x                                     |
| Esophageal ulcer                                                                                                                                                                                                                                                                                                                                              | 530.2  | K22.1                                              |
| Gastric ulcer                                                                                                                                                                                                                                                                                                                                                 | 531.x  | K25.x                                              |
| Duodenal ulcer                                                                                                                                                                                                                                                                                                                                                | 532.x  | K26.x                                              |
| Peptic ulcer                                                                                                                                                                                                                                                                                                                                                  | 533.x  | K27.x                                              |
| GJ ulcer                                                                                                                                                                                                                                                                                                                                                      | 534.x  | K28.x                                              |
| Gastritis/duodenitis                                                                                                                                                                                                                                                                                                                                          | 535.x  | K29.x                                              |

\* Benchimol EI et al. Rural and urban disparities in the care of Canadian patients with inflammatory bowel disease: a population-based study. Clin Epidemiol. 2018;10:1613–26. <https://doi.org/10.2147/CLEP.S178056>

|                                                                                                                                                                                                                                                                                                                                                                                                              |                                                             |                                                             |
|--------------------------------------------------------------------------------------------------------------------------------------------------------------------------------------------------------------------------------------------------------------------------------------------------------------------------------------------------------------------------------------------------------------|-------------------------------------------------------------|-------------------------------------------------------------|
| Intestinal obstruction                                                                                                                                                                                                                                                                                                                                                                                       | 560.8<br>560.9                                              | K31.5<br>K56.6                                              |
| Rectal/anal haemorrhage                                                                                                                                                                                                                                                                                                                                                                                      | 569.3                                                       | K62.5                                                       |
| Other disorder of rectum/anus, including:<br>(569.41) Ulcer                                                                                                                                                                                                                                                                                                                                                  | 569.4                                                       | K62.6<br>K62.8                                              |
| (569.42) Pain<br>(569.43) Sphincter tear (healed) (569.44)<br>Dysplasia<br>(569.45) Other specified, including<br>proctitis, inflammation                                                                                                                                                                                                                                                                    |                                                             |                                                             |
| Abscess of the intestine                                                                                                                                                                                                                                                                                                                                                                                     | 569.5                                                       | K63.0                                                       |
| Other disorders of intestine, including:<br>(569.81) Fistula (excl rectum) (569.82) Ulcer<br>of intestine (569.83) Perforation<br>(569.84) Angiodysplasia, no haemorrhage<br>(569.85) Angiodysplasia, with haemorrhage<br>(569.86) Dieulafoy<br>(569.89) Other, including:<br>- Enteroptosis<br>- Granuloma of intestine<br>- Prolapse of intestine<br>- Pericolitis<br>- Perisigmoiditis<br>- Visceroptosis | 569.8                                                       | K63.2<br>K63.3<br>K63.1<br>K55.2<br>K63.8                   |
| Malabsorption                                                                                                                                                                                                                                                                                                                                                                                                | 262.x<br>263.0<br>263.1<br>263.2<br>263.9<br>579.8<br>579.9 | E43.x<br>E44.0<br>E44.1<br>E45.x<br>E46.x<br>K90.8<br>K90.9 |
| <b>EXTRA-INTESTINAL MANIFESTATIONS:</b>                                                                                                                                                                                                                                                                                                                                                                      |                                                             |                                                             |
| Anal Fistula                                                                                                                                                                                                                                                                                                                                                                                                 | 565.1                                                       | K60.3                                                       |
| Anal Abscess                                                                                                                                                                                                                                                                                                                                                                                                 | 566.x                                                       | K61.0<br>K61.1<br>K61.2<br>K61.3<br>K61.4                   |
| Ureteral Fistula                                                                                                                                                                                                                                                                                                                                                                                             | 593.8                                                       | N28.81<br>N28.88                                            |
| Urethral Fistula                                                                                                                                                                                                                                                                                                                                                                                             | 599.1                                                       | N36.0                                                       |
| Fistula of stomach & duodenum                                                                                                                                                                                                                                                                                                                                                                                | 537.4                                                       | K31.6                                                       |
| Vesical fistula                                                                                                                                                                                                                                                                                                                                                                                              | 596.2                                                       | N32.2                                                       |
| Fistula involving female GU                                                                                                                                                                                                                                                                                                                                                                                  | 619.x                                                       | N82.x                                                       |
| Haemorrhoids, including:<br>(455.9) Anal skin tags                                                                                                                                                                                                                                                                                                                                                           | 455.x                                                       | I84.x                                                       |
| Rheumatoid arthritis                                                                                                                                                                                                                                                                                                                                                                                         | 713.1                                                       | M052<br>M053<br>M058<br>M059<br>M060<br>M061                |

|                                                                                                                                                                                                              |                         |                                                                                                                                                      |
|--------------------------------------------------------------------------------------------------------------------------------------------------------------------------------------------------------------|-------------------------|------------------------------------------------------------------------------------------------------------------------------------------------------|
|                                                                                                                                                                                                              |                         | M062<br>M064<br>M068<br>M069<br>M070<br>M080<br>M081<br>M082<br>M083<br>M084<br>M088<br>M089<br>M090<br>M091<br>M092<br>M098<br>M130<br>M131<br>M139 |
| Arthropathy associated with GI cause                                                                                                                                                                         | 713.3                   | M074<br>M075<br>M076                                                                                                                                 |
| Inflammatory spondylopathies,<br>including:<br>(720.0) Ankylosing spondylitis<br>(720.1) Spinal enthesopathy<br>(720.2) Sacroiliitis<br>(720.8) Other inflammatory<br>(720.9) Other unspecified inflammatory | 720.x                   | M45.x<br>M46.x                                                                                                                                       |
| Scleritis & episcleritis                                                                                                                                                                                     | 379.x                   | H15.x                                                                                                                                                |
| Unspecified iridocyclitis (uveitis<br>NOS)                                                                                                                                                                   | 364.3                   | H20.9                                                                                                                                                |
| Chorioretinitis, unspecified<br>(unveitis, posterior NOS)                                                                                                                                                    | 363.2                   | H30.9                                                                                                                                                |
| Acute and subacute iridocyclitis                                                                                                                                                                             | 364.0                   | H20.0                                                                                                                                                |
| Erythema nodosum                                                                                                                                                                                             | 695.2                   | L52                                                                                                                                                  |
| Pyoderma                                                                                                                                                                                                     | 686.0                   | L08.0                                                                                                                                                |
| Pyogenic granuloma of the skin and<br>soft tissue                                                                                                                                                            | 686.1                   | L98.0                                                                                                                                                |
| Oral aphthae                                                                                                                                                                                                 | 528.2                   | K12.0                                                                                                                                                |
| Short stature                                                                                                                                                                                                | 783.4                   | E34.3                                                                                                                                                |
| Osteoporosis                                                                                                                                                                                                 | 733.0<br>733.1          | M80.x<br>M81.x<br>M82.x<br>M83.x                                                                                                                     |
| Osteomyelitis                                                                                                                                                                                                | 730.0<br>730.1<br>730.2 | M86.x                                                                                                                                                |
| Acute glomerulonephritis                                                                                                                                                                                     | 580.x                   | N00.x                                                                                                                                                |
| Nephrolithiasis                                                                                                                                                                                              | 592.x                   | N20.x                                                                                                                                                |
| Primary Sclerosing Cholangitis                                                                                                                                                                               | 576.1                   | K83.0                                                                                                                                                |
| Venous embolism/thrombosis                                                                                                                                                                                   | 453.x                   | I82.x                                                                                                                                                |

**Table B:** List of Canadian Classification of Health Interventions (CCI) codes used to identify surgeries for IBD in the hospital discharge abstracts database. This code list was developed by Benchimol et al., 2018.<sup>†</sup>

| <b>RESECTIVE SURGERY</b>                                                                                                                                                                             |                                                                                                                                                                                                                                                                                                                                                                                                                                                                                                                                                                              |
|------------------------------------------------------------------------------------------------------------------------------------------------------------------------------------------------------|------------------------------------------------------------------------------------------------------------------------------------------------------------------------------------------------------------------------------------------------------------------------------------------------------------------------------------------------------------------------------------------------------------------------------------------------------------------------------------------------------------------------------------------------------------------------------|
| <b>1.NK.87</b><br>1.NK.87.BA<br>1.NK.87.DA<br>1.NK.87.LA<br>1.NK.87.DN<br>1.NK.87.RE<br>1.NK.87.DP<br>1.NK.87.RF<br>1.NK.87.DX<br>1.NK.87.TF<br>1.NK.87.DY<br>1.NK.87.TG                             | <b>Excision partial, small intestine</b><br>Simple excision, per orifice<br>Simple excision, laparoscopic<br>Simple excision, open<br>Enterocolostomy anastomosis, laparoscopic<br>Enterocolostomy anastomosis, open<br>Enteroenterostomy anastomosis, laparoscopic<br>Enteroenterostomy anastomosis, open<br>Stoma formation with distal closure, laparoscopic<br>Stoma formation with distal closure, open<br>Stoma formation with mucous fistula, laparoscopic<br>Stoma formation with mucous fistula, open                                                               |
| <b>1.NM.87</b><br>1.NM.87.BA<br>1.NM.87.DA<br>1.NM.87.LA<br>1.NM.87.DF<br>1.NM.87.RN<br>1.NM.87.DE<br>1.NM.87.RD<br>1.NM.87.DN<br>1.NM.87.RE<br>1.NM.87.DX<br>1.NM.87.TF<br>1.NM.87.DY<br>1.NM.87.TG | <b>Excision partial, large intestine</b><br>Simple excision, per orifice<br>Simple excision, laparoscopic<br>Simple excision, open<br>Colocolostomy anastomosis, laparoscopic<br>Colocolostomy anastomosis, open<br>Colorectal anastomosis, laparoscopic<br>Colorectal anastomosis, open<br>Enterocolostomy anastomosis, laparoscopic<br>Enterocolostomy anastomosis, open<br>Stoma formation and distal closure, laparoscopic<br>Stoma formation and distal closure, open<br>Stoma formation with mucous fistula, laparoscopic<br>Stoma formation with mucous fistula, open |
| <b>1.NM.89</b><br>1.NM.89.DF<br>1.NM.89.RN<br>1.NM.89.DX<br>1.NM.89.TF                                                                                                                               | <b>Excision total, large intestine</b><br>Ileorectal anastomosis, laparoscopic<br>Ileorectal anastomosis, open<br>Stoma formation with distal closure, laparoscopic<br>Stoma formation with distal closure, open                                                                                                                                                                                                                                                                                                                                                             |
| <b>1.NM.91</b><br>1.NM.91.DF<br>1.NM.91.RN<br>1.NM.91.DE<br>1.NM.91.RD<br>1.NM.91.DN<br>1.NM.91.RE<br>1.NM.91.DX<br>1.NM.91.TF                                                                       | <b>Excision radical, large intestine (including en bloc resection)</b><br>Colocolostomy anastomosis, laparoscopic<br>Colocolostomy anastomosis, open<br>Colorectal anastomosis, laparoscopic<br>Colorectal anastomosis, open<br>Enterocolostomy anastomosis, laparoscopic<br>Enterocolostomy anastomosis, open<br>Stoma formation with distal closure, laparoscopic<br>Stoma formation with distal closure, open                                                                                                                                                             |

<sup>†</sup> Benchimol EI et al. Rural and urban disparities in the care of Canadian patients with inflammatory bowel disease: a population-based study. Clin Epidemiol. 2018;10:1613–26. <https://doi.org/10.2147/CLEP.S178056>



**Table C:** List of Canadian Classification of Diagnostic (CCP) codes used to identify surgeries for IBD in the hospital discharge abstracts database. This code list was developed by Benchimol et al., 2018.<sup>‡</sup>

| <b>RESECTION/COLECTOMY FOR CD</b>                     | <b>COLECTOMY FOR UC</b>                               |
|-------------------------------------------------------|-------------------------------------------------------|
| 5741- multiple segmental resection of small intestine |                                                       |
| 5742- Another partial resection of small intestine    |                                                       |
| 5743- Total removal of small intestine                |                                                       |
| 575- partial excision of large intestine              | 575- partial excision of large intestine              |
| 5751- multiple segmental resection of large intestine | 5751- multiple segmental resection of large intestine |
| 5753-right hemicolectomy                              | 5753-right hemicolectomy                              |
| 5755-left hemicolectomy                               | 5755-left hemicolectomy                               |
| 576-total colectomy                                   | 576-total colectomy                                   |
| 5752- cecectomy                                       | 5752- cecectomy                                       |
| 5754- resection of transverse colon                   | 5754- resection of transverse colon                   |
| 5756- sigmoidectomy                                   | 5756- sigmoidectomy                                   |
| 5759- other partial excision of large intestine       | 5759- other partial excision of large intestine       |

**Table D:** List of Canadian Classification of Diagnostic (CCP) and Canadian Classification of Health Interventions (CCI) codes used to identify colon and sigmoidoscopies in the hospital discharge abstracts database.

|         | <b>CANADIAN CLASSIFICATION OF DIAGNOSTIC – CCP</b>           |
|---------|--------------------------------------------------------------|
| 0120    | Nonoperative endoscopy of lower gastrointestinal tract       |
| 0122    | Other nonoperative colonoscopy                               |
| 0124    | Other nonoperative proctosigmoidoscopy                       |
| 0125    | Anoscopy                                                     |
| 5793    | Brush biopsy of large intestine                              |
| 5794    | Other biopsy of large intestine                              |
| 5795    | Biopsy of intestine, unquantified                            |
|         | <b>CANADIAN CLASSIFICATION OF HEALTH INTERVENTIONS – CCI</b> |
| 2.NM.70 | Colonoscopy (for inspection) /Sigmoidoscopy (for inspection) |
| 2.NM.71 | Colonoscopy with biopsy                                      |
| 2.NQ.70 | Rectoscopy (for inspection)                                  |
| 2.NQ.71 | Biopsy of rectum                                             |

<sup>‡</sup> Benchimol EI et al. Rural and urban disparities in the care of Canadian patients with inflammatory bowel disease: a population-based study. Clin Epidemiol. 2018;10:1613–26. <https://doi.org/10.2147/CLEP.S178056>

**Table E:** List of drug identification numbers (DINs) used to identify medications for IBD in the prescription medication claims database. This code list was previously developed by Peña-Sánchez et al, 2017.<sup>§</sup>

| GROUP            | DIN      | NAME                    | GENERIC NAME              |
|------------------|----------|-------------------------|---------------------------|
| BIOLOGICS        | 00950898 | REMICADE                | INFLIXIMAB                |
| BIOLOGICS        | 00950899 | REMICADE (EDS)          | INFLIXIMAB                |
| BIOLOGICS        | 02244016 | REMICADE (EDS)          | INFLIXIMAB                |
| BIOLOGICS        | 02258595 | HUMIRA (EDS)            | ADALIMUMAB                |
| BIOLOGICS        | 02324776 | SIMPONI (EDS)           | GOLIMUMAB                 |
| BIOLOGICS        | 02324784 | SIMPONI (EDS)           | GOLIMUMAB                 |
| BIOLOGICS        | 02331675 | CIMZIA (EDS)            | CERTOLIZUMAB PEGOL        |
| BIOLOGICS        | 02413175 | SIMPONI                 | GOLIMUMAB                 |
| BIOLOGICS        | 02413183 | SIMPONI                 | GOLIMUMAB                 |
| BIOLOGICS        | 02417472 | SIMPONI I.V.            | GOLIMUMAB                 |
| BIOLOGICS        | 02419475 | INFLECTRA               | INFLIXIMAB                |
| BIOLOGICS        | 02419483 | REMSIMA                 | INFLIXIMAB                |
| BIOLOGICS        | 02436841 | ENTYVIO                 | VEDOLIZUMAB               |
| BIOLOGICS        | 97799756 | HUMIRA PF SYRINGE (EDS) | ADALIMUMAB                |
| BIOLOGICS        | 97799757 | HUMIRA PEN (EDS)        | ADALIMUMAB                |
| BIOLOGICS        | 02320673 | STELARA                 | USTEKINUMAB               |
| BIOLOGICS        | 02320681 | STELARA                 | USTEKINUMAB               |
| BIOLOGICS        | 02459671 | STELARA                 | USTEKINUMAB               |
| IMMUNUMODULATORS | 00004596 | IMURAN                  | AZATHIOPRINE              |
| IMMUNUMODULATORS | 00004723 | PURINETHOL (EDS)        | MERCAPTOPYRINE            |
| IMMUNUMODULATORS | 00014915 | METHOTREXATE            | METHOTREXATE              |
| IMMUNUMODULATORS | 00321397 | METHOTREXATE            | METHOTREXATE              |
| IMMUNUMODULATORS | 00321400 | METHOTREXATE            | METHOTREXATE              |
| IMMUNUMODULATORS | 00519286 | METHOTREXATE            | METHOTREXATE              |
| IMMUNUMODULATORS | 00593249 | SANDIMMUNE (EDS)        | CYCLOSPORINE (T)          |
| IMMUNUMODULATORS | 00614327 | METHOTREXATE            | METHOTREXATE              |
| IMMUNUMODULATORS | 00614335 | METHOTREXATE            | METHOTREXATE              |
| IMMUNUMODULATORS | 00614343 | METHOTREXATE            | METHOTREXATE              |
| IMMUNUMODULATORS | 00632619 | METHOTREXATE            | METHOTREXATE              |
| IMMUNUMODULATORS | 00755591 | SANDIMMUNE (EDS)        | CYCLOSPORINE (TRANSPLANT) |
| IMMUNUMODULATORS | 00755605 | SANDIMMUNE (EDS)        | CYCLOSPORINE (T)          |
| IMMUNUMODULATORS | 00950513 | SANDIMMUNE (EDS)        | CYCLOSPORINE (P)          |
| IMMUNUMODULATORS | 00950521 | SANDIMMUNE (EDS)        | CYCLOSPORINE (P)          |
| IMMUNUMODULATORS | 00950548 | SANDIMMUNE (EDS)        | CYCLOSPORINE (P)          |
| IMMUNUMODULATORS | 00950556 | SANDIMMUNE (EDS)        | CYCLOSPORINE (P)          |
| IMMUNUMODULATORS | 00950792 | NEORAL (EDS)            | CYCLOSPORINE              |
| IMMUNUMODULATORS | 00950793 | NEORAL (EDS)            | CYCLOSPORINE              |
| IMMUNUMODULATORS | 00950807 | NEORAL (EDS)            | CYCLOSPORINE              |
| IMMUNUMODULATORS | 00950815 | NEORAL (EDS)            | CYCLOSPORINE              |
| IMMUNUMODULATORS | 00950823 | NEORAL (EDS)            | CYCLOSPORINE              |
| IMMUNUMODULATORS | 00950887 | CELLCEPT (EDS)          | MYCOPHENOLATE MOFETIL     |
| IMMUNUMODULATORS | 00950888 | CELLCEPT (EDS)          | MYCOPHENOLATE MOFETIL     |

<sup>§</sup> Peña-Sánchez JN et al. Impact of an integrated model of care on outcomes of patients with inflammatory bowel diseases: Evidence from a population-based study. *Journal of Crohn's and Colitis*. 2017;11(12): 1471-9.

<http://dx.doi.org/10.1093/ecco-jcc/jjx106>

|    |                  |          |                            |                                    |
|----|------------------|----------|----------------------------|------------------------------------|
| 1  | IMMUNUMODULATORS | 00950897 | MYCOPHENOLATE              | MYCOPHENOLATE MOFETIL              |
| 2  | IMMUNUMODULATORS | 00950937 | CELLCEPT                   | MYCOPHENOLATE MOFETIL              |
| 3  | IMMUNUMODULATORS | 00951163 | APO-MYCOPHENOLATE (EDS)    | MYCOPHENOLATE MOFETIL              |
| 4  | IMMUNUMODULATORS | 00951164 | APO-MYCOPHENOLATE (EDS)    | MYCOPHENOLATE MOFETIL              |
| 5  | IMMUNUMODULATORS | 00951165 | MYLAN-MYCOPHENOLATE (EDS)  | MYCOPHENOLATE MOFETIL              |
| 6  | IMMUNUMODULATORS | 00951166 | MYLAN-MYCOPHENOLATE (EDS)  | MYCOPHENOLATE MOFETIL              |
| 7  | IMMUNUMODULATORS | 00951167 | NOVO-MYCOPHENOLATE (EDS)   | MYCOPHENOLATE MOFETIL              |
| 8  | IMMUNUMODULATORS | 00951168 | NOVO-MYCOPHENOLATE (EDS)   | MYCOPHENOLATE MOFETIL              |
| 9  | IMMUNUMODULATORS | 00951169 | SANDOZ MYCOPHENOLATE(EDS)  | MYCOPHENOLATE MOFETIL              |
| 10 | IMMUNUMODULATORS | 00951170 | SANDOZ MYCOPHENOLATE(EDS)  | MYCOPHENOLATE MOFETIL              |
| 11 | IMMUNUMODULATORS | 00951171 | CO MYCOPHENOLATE (EDS)     | MYCOPHENOLATE MOFETIL              |
| 12 | IMMUNUMODULATORS | 00951172 | MYCOPHENOLATE MOFETIL(EDS) | MYCOPHENOLATE MOFETIL              |
| 13 | IMMUNUMODULATORS | 00951174 | MYCOPHENOLATE MOFETIL(EDS) | MYCOPHENOLATE MOFETIL              |
| 14 | IMMUNUMODULATORS | 00951175 | JAMP-MYCOPHENOLATE (EDS)   | MYCOPHENOLATE MOFETIL              |
| 15 | IMMUNUMODULATORS | 00951176 | JAMP-MYCOPHENOLATE (EDS)   | MYCOPHENOLATE MOFETIL              |
| 16 | IMMUNUMODULATORS | 01907182 | SANDIMMUNE (EDS)           | CYCLOSPORINE (T)                   |
| 17 | IMMUNUMODULATORS | 01907204 | METHOTREXATE               | METHOTREXATE                       |
| 18 | IMMUNUMODULATORS | 02099705 | METHOTREXATE               | METHOTREXATE                       |
| 19 | IMMUNUMODULATORS | 02150662 | NEORAL (EDS)               | CYCLOSPORINE (TRANSPLANT)          |
| 20 | IMMUNUMODULATORS | 02150670 | NEORAL (EDS)               | CYCLOSPORINE (TRANSPLANT)          |
| 21 | IMMUNUMODULATORS | 02150689 | NEORAL (EDS)               | CYCLOSPORINE (TRANSPLANT)          |
| 22 | IMMUNUMODULATORS | 02150697 | NEORAL (EDS)               | CYCLOSPORINE (TRANSPLANT)          |
| 23 | IMMUNUMODULATORS | 02161168 | METHOTREXATE SODIUM INJEC  | METHOTREXATE (METHOTREXATE SODIUM) |
| 24 | IMMUNUMODULATORS | 02170663 | METHOTREXATE               | METHOTREXATE                       |
| 25 | IMMUNUMODULATORS | 02170671 | METHOTREXATE               | METHOTREXATE                       |
| 26 | IMMUNUMODULATORS | 02170698 | METHOTREXATE               | METHOTREXATE                       |
| 27 | IMMUNUMODULATORS | 02182750 | METHOTREXATE               | METHOTREXATE                       |
| 28 | IMMUNUMODULATORS | 02182777 | METHOTREXATE               | METHOTREXATE                       |
| 29 | IMMUNUMODULATORS | 02182947 | METHOTREXATE               | METHOTREXATE                       |
| 30 | IMMUNUMODULATORS | 02182955 | METHOTREXATE               | METHOTREXATE                       |
| 31 | IMMUNUMODULATORS | 02182963 | APO-METHOTREXATE           | METHOTREXATE                       |
| 32 | IMMUNUMODULATORS | 02182971 | METHOTREXATE INJECTION, U  | METHOTREXATE (METHOTREXATE SODIUM) |
| 33 | IMMUNUMODULATORS | 02192748 | CELLCEPT (EDS)             | MYCOPHENOLATE MOFETIL              |
| 34 | IMMUNUMODULATORS | 02231491 | MYLAN-AZATHIOPRINE         | AZATHIOPRINE                       |
| 35 | IMMUNUMODULATORS | 02236799 | RATIO-AZATHIOPRINE         | AZATHIOPRINE                       |
| 36 | IMMUNUMODULATORS | 02236819 | TEVA-AZATHIOPRINE          | AZATHIOPRINE                       |

|    |                  |          |                               |                                       |
|----|------------------|----------|-------------------------------|---------------------------------------|
| 1  |                  |          |                               |                                       |
| 2  |                  |          |                               |                                       |
| 3  |                  |          |                               |                                       |
| 4  |                  |          |                               |                                       |
| 5  |                  |          |                               |                                       |
| 6  |                  |          |                               |                                       |
| 7  |                  |          |                               |                                       |
| 8  |                  |          |                               |                                       |
| 9  |                  |          |                               |                                       |
| 10 |                  |          |                               |                                       |
| 11 |                  |          |                               |                                       |
| 12 |                  |          |                               |                                       |
| 13 |                  |          |                               |                                       |
| 14 |                  |          |                               |                                       |
| 15 |                  |          |                               |                                       |
| 16 |                  |          |                               |                                       |
| 17 |                  |          |                               |                                       |
| 18 |                  |          |                               |                                       |
| 19 |                  |          |                               |                                       |
| 20 |                  |          |                               |                                       |
| 21 |                  |          |                               |                                       |
| 22 |                  |          |                               |                                       |
| 23 |                  |          |                               |                                       |
| 24 |                  |          |                               |                                       |
| 25 |                  |          |                               |                                       |
| 26 |                  |          |                               |                                       |
| 27 |                  |          |                               |                                       |
| 28 |                  |          |                               |                                       |
| 29 |                  |          |                               |                                       |
| 30 |                  |          |                               |                                       |
| 31 |                  |          |                               |                                       |
| 32 |                  |          |                               |                                       |
| 33 |                  |          |                               |                                       |
| 34 |                  |          |                               |                                       |
| 35 |                  |          |                               |                                       |
| 36 |                  |          |                               |                                       |
| 37 |                  |          |                               |                                       |
| 38 |                  |          |                               |                                       |
| 39 |                  |          |                               |                                       |
| 40 |                  |          |                               |                                       |
| 41 |                  |          |                               |                                       |
| 42 |                  |          |                               |                                       |
| 43 |                  |          |                               |                                       |
| 44 |                  |          |                               |                                       |
| 45 |                  |          |                               |                                       |
| 46 |                  |          |                               |                                       |
| 47 |                  |          |                               |                                       |
| 48 |                  |          |                               |                                       |
| 49 |                  |          |                               |                                       |
| 50 |                  |          |                               |                                       |
| 51 |                  |          |                               |                                       |
| 52 |                  |          |                               |                                       |
| 53 |                  |          |                               |                                       |
| 54 |                  |          |                               |                                       |
| 55 |                  |          |                               |                                       |
| 56 |                  |          |                               |                                       |
| 57 |                  |          |                               |                                       |
| 58 |                  |          |                               |                                       |
| 59 |                  |          |                               |                                       |
| 60 |                  |          |                               |                                       |
|    | IMMUNUMODULATORS | 02237484 | CELLCEPT (EDS)                | MYCOPHENOLATE MOFETIL                 |
|    | IMMUNUMODULATORS | 02237671 | NEORAL (EDS)                  | CYCLOSPORINE<br>(TRANSPLANT)          |
|    | IMMUNUMODULATORS | 02240347 | CELLCEPT IV                   | MYCOPHENOLATE MOFETIL                 |
|    | IMMUNUMODULATORS | 02242145 | CELLCEPT (EDS)                | MYCOPHENOLATE MOFETIL                 |
|    | IMMUNUMODULATORS | 02242907 | APO-AZATHIOPRINE              | AZATHIOPRINE                          |
|    | IMMUNUMODULATORS | 02243371 | AZATHIOPRINE-50               | AZATHIOPRINE                          |
|    | IMMUNUMODULATORS | 02244324 | APO-CYCLOSPORINE (EDS)        | CYCLOSPORINE                          |
|    | IMMUNUMODULATORS | 02244798 | RATIO-METHOTREXATE            | METHOTREXATE                          |
|    | IMMUNUMODULATORS | 02244895 | IMURAN                        | AZATHIOPRINE<br>(AZATHIOPRINE SODIUM) |
|    | IMMUNUMODULATORS | 02248843 | NU-AZATHIOPRINE               | AZATHIOPRINE                          |
|    | IMMUNUMODULATORS | 02264560 | MYFORTIC (EDS)                | MYCOPHENOLATE SODIUM                  |
|    | IMMUNUMODULATORS | 02264579 | MYFORTIC (EDS)                | MYCOPHENOLATE SODIUM                  |
|    | IMMUNUMODULATORS | 02304767 | METOJECT                      | METHOTREXATE                          |
|    | IMMUNUMODULATORS | 02313855 | SANDOZ<br>MYCOPHENOLATE(EDS)  | MYCOPHENOLATE MOFETIL                 |
|    | IMMUNUMODULATORS | 02320029 | METOJECT                      | METHOTREXATE                          |
|    | IMMUNUMODULATORS | 02320037 | METOJECT                      | METHOTREXATE                          |
|    | IMMUNUMODULATORS | 02320045 | METOJECT                      | METHOTREXATE                          |
|    | IMMUNUMODULATORS | 02320053 | METOJECT                      | METHOTREXATE                          |
|    | IMMUNUMODULATORS | 02320630 | SANDOZ<br>MYCOPHENOLATE(EDS)  | MYCOPHENOLATE MOFETIL                 |
|    | IMMUNUMODULATORS | 02327236 | METHOTREXATE<br>INJECTION, B  | METHOTREXATE                          |
|    | IMMUNUMODULATORS | 02343002 | AZATHIOPRINE                  | AZATHIOPRINE                          |
|    | IMMUNUMODULATORS | 02348675 | NOVO-MYCOPHENOLATE<br>(EDS)   | MYCOPHENOLATE MOFETIL                 |
|    | IMMUNUMODULATORS | 02352559 | APO-MYCOPHENOLATE<br>(EDS)    | MYCOPHENOLATE MOFETIL                 |
|    | IMMUNUMODULATORS | 02352567 | APO-MYCOPHENOLATE<br>(EDS)    | MYCOPHENOLATE MOFETIL                 |
|    | IMMUNUMODULATORS | 02364883 | NOVO-MYCOPHENOLATE<br>(EDS)   | MYCOPHENOLATE MOFETIL                 |
|    | IMMUNUMODULATORS | 02370549 | MYLAN-MYCOPHENOLATE<br>(EDS)  | MYCOPHENOLATE MOFETIL                 |
|    | IMMUNUMODULATORS | 02371154 | MYLAN-MYCOPHENOLATE<br>(EDS)  | MYCOPHENOLATE MOFETIL                 |
|    | IMMUNUMODULATORS | 02372738 | APO-MYCOPHENOLIC<br>ACID(EDS) | MYCOPHENOLATE SODIUM                  |
|    | IMMUNUMODULATORS | 02372746 | APO-MYCOPHENOLIC<br>ACID(EDS) | MYCOPHENOLATE SODIUM                  |
|    | IMMUNUMODULATORS | 02378574 | MYCOPHENOLATE<br>MOFETIL(EDS) | MYCOPHENOLATE MOFETIL                 |
|    | IMMUNUMODULATORS | 02379996 | CO MYCOPHENOLATE (EDS)        | MYCOPHENOLATE MOFETIL                 |
|    | IMMUNUMODULATORS | 02380382 | JAMP-MYCOPHENOLATE<br>(EDS)   | MYCOPHENOLATE MOFETIL                 |
|    | IMMUNUMODULATORS | 02383780 | MYCOPHENOLATE<br>MOFETIL(EDS) | MYCOPHENOLATE MOFETIL                 |
|    | IMMUNUMODULATORS | 02386399 | JAMP-MYCOPHENOLATE<br>(EDS)   | MYCOPHENOLATE MOFETIL                 |
|    | IMMUNUMODULATORS | 02398427 | METHOTREXATE INJECTION        | METHOTREXATE                          |
|    | IMMUNUMODULATORS | 02415275 | MERCAPTOPYRINE<br>TABLETS(ED) | MERCAPTOPYRINE                        |

|                  |          |                           |                                         |
|------------------|----------|---------------------------|-----------------------------------------|
| IMMUNUMODULATORS | 02417626 | METHOTREXATE INJECTION, U | METHOTREXATE (METHOTREXATE SODIUM)      |
| IMMUNUMODULATORS | 02419173 | JAMP-METHOTREXATE         | METHOTREXATE (METHOTREXATE SODIUM)      |
| IMMUNUMODULATORS | 02422166 | METHOTREXATE INJECTION, B | METHOTREXATE                            |
| IMMUNUMODULATORS | 02422174 | METHOTREXATE INJECTION, B | METHOTREXATE                            |
| IMMUNUMODULATORS | 02422182 | METHOTREXATE INJECTION, B | METHOTREXATE                            |
| IMMUNUMODULATORS | 02422190 | METHOTREXATE INJECTION, B | METHOTREXATE                            |
| IMMUNUMODULATORS | 02422204 | METHOTREXATE INJECTION, B | METHOTREXATE                            |
| 5-ASA            | 00263869 | S.A.S. 500                | SULFASALAZINE (SALICYLAZOSULFAPYRIDINE) |
| 5-ASA            | 00410640 | APO SULFASALAZINE TAB 500 | SULFASALAZINE                           |
| 5-ASA            | 00445126 | S.A.S. 500                | SULFASALAZINE (SALICYLAZOSULFAPYRIDINE) |
| 5-ASA            | 00598461 | PMS-SULFASALAZINE         | SULFASALAZINE (SALICYLAZOSULFAPYRIDINE) |
| 5-ASA            | 00598488 | PMS-SULFASALAZINE         | SULFASALAZINE (SALICYLAZOSULFAPYRIDINE) |
| 5-ASA            | 00613568 | SAS ENEMA 3GM/100ML       | SULFASALAZINE                           |
| 5-ASA            | 00685925 | RATIO-SULFASALAZINE       | SULFASALAZINE (SALICYLAZOSULFAPYRIDINE) |
| 5-ASA            | 00685933 | RATIO-SULFASALAZINE       | SULFASALAZINE (SALICYLAZOSULFAPYRIDINE) |
| 5-ASA            | 01914030 | MESASAL                   | 5-AMINOSALICYLIC ACID (MESALAMINE)      |
| 5-ASA            | 01940384 | PENTASA                   | 5-AMINOSALICYLIC ACID (MESALAMINE)      |
| 5-ASA            | 01997580 | ASACOL                    | 5-AMINOSALICYLIC ACID (MESALAMINE)      |
| 5-ASA            | 02004658 | SALAZOPYRIN               | SULFASALAZINE (SALICYLAZOSULFAPYRIDINE) |
| 5-ASA            | 02004682 | SALAZOPYRIN               | SULFASALAZINE (SALICYLAZOSULFAPYRIDINE) |
| 5-ASA            | 02004690 | SALAZOPYRIN               | SULFASALAZINE (SALICYLAZOSULFAPYRIDINE) |
| 5-ASA            | 02006413 | DIPENTUM                  | OLSALAZINE SODIUM                       |
| 5-ASA            | 02063808 | DIPENTUM                  | OLSALAZINE SODIUM                       |
| 5-ASA            | 02064472 | SALAZOPYRIN               | SULFASALAZINE (SALICYLAZOSULFAPYRIDINE) |
| 5-ASA            | 02064480 | SALAZOPYRIN               | SULFASALAZINE (SALICYLAZOSULFAPYRIDINE) |
| 5-ASA            | 02064499 | SALAZOPYRIN               | SULFASALAZINE (SALICYLAZOSULFAPYRIDINE) |
| 5-ASA            | 02099675 | PENTASA                   | 5-AMINOSALICYLIC ACID (MESALAMINE)      |
| 5-ASA            | 02099683 | PENTASA                   | 5-AMINOSALICYLIC ACID (MESALAMINE)      |

|       |          |                          |                                    |
|-------|----------|--------------------------|------------------------------------|
| 5-ASA | 02112752 | SALOFALK                 | 5-AMINOSALICYLIC ACID (MESALAMINE) |
| 5-ASA | 02112760 | SALOFALK                 | 5-AMINOSALICYLIC ACID (MESALAMINE) |
| 5-ASA | 02112787 | SALOFALK                 | 5-AMINOSALICYLIC ACID (MESALAMINE) |
| 5-ASA | 02112795 | SALOFALK RETENTION ENEMA | 5-AMINOSALICYLIC ACID (MESALAMINE) |
| 5-ASA | 02112809 | SALOFALK RETENTION ENEMA | 5-AMINOSALICYLIC ACID (MESALAMINE) |
| 5-ASA | 02153521 | PENTASA                  | 5-AMINOSALICYLIC ACID (MESALAMINE) |
| 5-ASA | 02153556 | PENTASA                  | 5-AMINOSALICYLIC ACID (MESALAMINE) |
| 5-ASA | 02153564 | PENTASA                  | 5-AMINOSALICYLIC ACID (MESALAMINE) |
| 5-ASA | 02171929 | NOVO-5-ASA               | 5-AMINOSALICYLIC ACID (MESALAMINE) |
| 5-ASA | 02242146 | SALOFALK                 | 5-AMINOSALICYLIC ACID (MESALAMINE) |
| 5-ASA | 02267217 | ASACOL 800               | 5-AMINOSALICYLIC ACID (MESALAMINE) |
| 5-ASA | 02297558 | MEZAVANT                 | 5-AMINOSALICYLIC ACID (MESALAMINE) |
| 5-ASA | 02351463 | 5-AMINOSALICYLIC ACID    | 5-AMINOSALICYLIC ACID (MESALAMINE) |
| 5-ASA | 02399466 | PENTASA                  | 5-AMINOSALICYLIC ACID (MESALAMINE) |



**Appendix 2**–Description of inflammatory bowel disease (IBD) case definitions used in the study

| Authors                        | Validation place | Case definition                                                                                                                                                                                                                                                                                                                      | Use                                     |
|--------------------------------|------------------|--------------------------------------------------------------------------------------------------------------------------------------------------------------------------------------------------------------------------------------------------------------------------------------------------------------------------------------|-----------------------------------------|
| Bernstein et al <sup>17</sup>  | Manitoba, Canada | <u>Within 2 years of health care coverage:</u><br>- Had five or more separate health care contacts with the diagnosis of IBD<br><u>In less than 2 years:</u><br>- Had three or more health care contacts with the diagnosis of IBD<br><u>Binary classification scores:</u><br>- Sensitivity, 74.4–89.2%; and specificity, 89.8–93.7% | Main analysis                           |
| Rezaie et al <sup>29</sup>     | Alberta, Canada  | <u>Within a two-year period:</u><br>- Individuals who experienced at least two hospitalizations or had four physician claims with a diagnosis of IBD<br><u>Binary classification scores:</u><br>- Specificity, 99.8%; sensitivity, 83.4%                                                                                             | Sensitivity analysis, matched cohort #2 |
| Benchmiol et al. <sup>22</sup> | Ontario, Canada  | <u>Within 4 years:</u><br>- At least five physician contacts or two hospitalizations with the diagnosis of IBD<br><u>Binary classification scores:</u><br>- Sensitivity, 76.8%; specificity, 96.2%                                                                                                                                   | Sensitivity analysis, matched cohort #3 |



**Appendix 3**—Measures of association between First Nation status (reference general population) and each of the study outcomes, matched cohort#2 (Rezaie et al case definition)

| Outcomes                            | Stratified analysis         |                         |                         |                         |                            |                         |
|-------------------------------------|-----------------------------|-------------------------|-------------------------|-------------------------|----------------------------|-------------------------|
|                                     | Full-group analysis (n=990) |                         | Crohn's Disease (n=526) |                         | Ulcerative Colitis (n=464) |                         |
|                                     | Unadjusted HR (95%CI)       | Adjusted HR (95%CI)*    | Unadjusted HR (95%CI)   | Adjusted HR (95%CI)**   | Unadjusted HR (95%CI)      | Adjusted HR (95%CI)***  |
| Outpatient gastroenterologist visit | 0.86 (0.70-1.05)            | 0.87 (0.71-1.06)        | 0.80 (0.58-1.10)        | 0.81 (0.59-1.11)        | 0.90 (0.70-1.17)           | 0.91 (0.70-1.18)        |
| Colonoscopy                         | 0.96 (0.79-1.18)            | 0.90 (0.73-1.10)        | 0.82 (0.58-1.15)        | 0.81 (0.58-1.15)        | 0.95 (0.73-1.22)           | 0.95 (0.74-1.23)        |
| Prescription claim for IBD          | <b>0.74 (0.61-0.90)</b>     | <b>0.68 (0.56-0.83)</b> | <b>0.61 (0.44-0.86)</b> | <b>0.61 (0.43-0.85)</b> | <b>0.74 (0.58-0.95)</b>    | <b>0.74 (0.57-0.95)</b> |
| Prescription claim of a Biologic    | 0.66 (0.42-1.05)            | 0.74 (0.46-1.17)        | 0.77 (0.43-1.39)        | 0.78 (0.43-1.41)        | 0.67 (0.32-1.41)           | 0.67 (0.32-1.42)        |
| Prescription claim of an IM         | <b>0.66 (0.44-0.93)</b>     | 0.74 (0.52-1.05)        | 0.63 (0.39-1.04)        | 0.65 (0.40-1.07)        | 0.82 (0.50-1.36)           | 0.85 (0.51-1.42)        |
| Prescription claim of a 5-ASA       | 0.86 (0.70-1.06)            | <b>0.74 (0.60-0.91)</b> | <b>0.66 (0.45-0.97)</b> | <b>0.63 (0.43-0.92)</b> | 0.80 (0.62-1.03)           | 0.79 (0.62-1.02)        |
| IBD-specific hospitalization        | 1.21 (0.93-1.56)            | 1.28 (0.99-1.67)        | 1.28 (0.88-1.86)        | 1.31 (0.90-1.91)        | 1.25 (0.87-1.80)           | 1.25 (0.87-1.80)        |
| IBD-related hospitalization         | <b>1.33 (1.04-1.68)</b>     | <b>1.39 (1.09-1.77)</b> | 1.29 (0.90-1.84)        | 1.28 (0.89-1.83)        | <b>1.48 (1.06-2.06)</b>    | <b>1.47 (1.06-2.05)</b> |
| Surgery for IBD                     | 1.06 (0.76-1.48)            | 1.04 (0.74-1.46)        | 0.83 (0.48-1.43)        | 0.82 (0.47-1.43)        | 1.26 (0.82-1.94)           | 1.23 (0.80-1.89)        |

HR: hazard ratio, 95%CI: 95% confidence interval

\* Models adjusted by rural or urban status, and diagnostic type (n=986).

\*\* Crohn's Disease group, models adjusted by rural or urban status (n=524).

\*\*\* Ulcerative colitis group, models adjusted by rural or urban status (n=462).

**Appendix 4**—Measures of association between First Nation status (reference general population) and each of the study outcomes, matched cohort#3 (Benchimol et al case definition)

| Outcomes                            | Stratified analysis            |                            |                          |                             |                               |                                  |
|-------------------------------------|--------------------------------|----------------------------|--------------------------|-----------------------------|-------------------------------|----------------------------------|
|                                     | Full-group analysis<br>(n=708) |                            | Crohn's Disease (n=365)  |                             | Ulcerative Colitis<br>(n=343) |                                  |
|                                     | Unadjusted<br>HR<br>(95%CI)    | Adjusted<br>HR<br>(95%CI)* | Unadjusted<br>HR (95%CI) | Adjusted<br>HR<br>(95%CI)** | Unadjusted<br>HR<br>(95%CI)   | Adjusted<br>HR<br>(95%CI)**<br>* |
| Outpatient gastroenterologist visit | 1.11 (0.90-1.38)               | 1.17 (0.93-1.45)           | 0.85 (0.59-1.24)         | 0.92 (0.63-1.35)            | <b>1.34 (1.02-1.77)</b>       | <b>1.36 (1.03-1.80)</b>          |
| Colonoscopy                         | 1.19 (0.97-1.47)               | 1.11 (0.90-1.38)           | 1.04 (0.72-1.50)         | 1.07 (0.73-1.55)            | 1.13 (0.87-1.47)              | 1.15 (0.88-1.49)                 |
| Prescription claim for IBD          | <b>0.59 (0.47-0.74)</b>        | <b>0.50 (0.40-0.63)</b>    | <b>0.56 (0.38-0.82)</b>  | <b>0.54 (0.36-0.80)</b>     | <b>0.48 (0.36-0.64)</b>       | <b>0.49 (0.37-0.65)</b>          |
| Prescription claim of a Biologic    | 0.68 (0.41-1.13)               | 0.78 (0.47-1.30)           | 0.78 (0.40-1.55)         | 0.78 (0.39-1.56)            | 0.72 (0.34-1.53)              | 0.77 (0.36-1.64)                 |
| Prescription claim of an IM         | 0.73 (0.50-1.06)               | 0.83 (0.56-1.21)           | 0.72 (0.43-1.23)         | 0.70 (0.41-1.20)            | 0.93 (0.54-1.59)              | 0.98 (0.57-1.70)                 |
| Prescription claim of a 5-ASA       | <b>0.69 (0.55-0.87)</b>        | <b>0.54 (0.43-0.69)</b>    | <b>0.64 (0.41-0.98)</b>  | <b>0.61 (0.40-0.95)</b>     | <b>0.51 (0.39-0.68)</b>       | <b>0.51 (0.39-0.68)</b>          |
| IBD-specific hospitalization        | 1.26 (0.95-1.67)               | 1.30 (0.98-1.74)           | <b>1.53 (1.02-2.28)</b>  | 1.37 (0.91-2.08)            | 1.23 (0.83-1.83)              | 1.22 (0.82-1.82)                 |
| IBD-related hospitalization         | <b>1.46 (1.13-1.89)</b>        | <b>1.50 (1.16-1.96)</b>    | <b>1.67 (1.14-2.45)</b>  | <b>1.51 (1.02-2.24)</b>     | <b>1.48 (1.04-2.10)</b>       | <b>1.48 (1.04-2.10)</b>          |
| Surgery for IBD                     | 1.15 (0.81-1.63)               | 1.14 (0.80-1.63)           | 1.16 (0.66-2.02)         | 1.10 (0.63-1.95)            | 1.16 (0.74-1.84)              | 1.17 (0.74-1.86)                 |

HR: hazard ratio, 95%CI: 95% confidence interval

\* Models adjusted by rural or urban status, and diagnostic type (n=707).

\*\* Crohn's Disease group, models adjusted by rural or urban status (n=364).

\*\*\* Ulcerative colitis group, models adjusted by rural or urban status.
